# Supplementary material for: Clinical experience with an online adaptive radiotherapy for prostate cancer: successful treatment time optimization
Source: Research Square preprint supplement (doi:10.21203/rs.3.rs-7807604/v1), 2025-10-29
Supplement: Supplementary file 1 [file 404bd1ce133a3a4f0954690b.pdf]

# Clinical experience with an online adaptive radiotherapy for prostate cancer: successful treatment time optimization

## 1 Supplements

**Table 1:** Data selection

| Step                                                     | Number of sessions (patients) |
|----------------------------------------------------------|-------------------------------|
| All Ethos sessions delivered (Jul 2023 – Dec 2024)       | 1977 (89)                     |
| Selected: primary prostate cancer only                   | 1380 (69)                     |
| Excluded: scheduled (non-adaptive) plans                 | –7                            |
| Excluded: incomplete time tracking                       | –2                            |
| Excluded: VMAT plans (atypically long calculation times) | –5                            |
| Final dataset for analysis                               | 1366 (69)                     |

**Table 2:** Data filtering

| Filter                      | Sub-analysis                        |                             |
|-----------------------------|-------------------------------------|-----------------------------|
|                             | Manual vs. automated PRW contouring | Without vs. with HyperSight |
| Learning phase              | exclude                             | exclude                     |
| Sessions with HyperSight    | exclude                             | include                     |
| Sessions without HyperSight | include                             | include                     |
| Manual PRW contouring       | include                             | exclude                     |
